# Supplementary material for: Accelerating rates of Arctic carbon cycling revealed by long-term atmospheric CO2 measurements
Source: PubMed Central journal article supplement — Sci Adv. 2018 Jul 11;4(7):eaao1167. doi: 10.1126/sciadv.aao1167 (PMC6040845; doi:10.1126/sciadv.aao1167), 2018-07-11
Supplement: aao1167_SM.pdf [file aao1167_SM.pdf]

## Supplementary Materials for

### Accelerating rates of Arctic carbon cycling revealed by long-term atmospheric CO<sub>2</sub> measurements

Su-Jong Jeong\*, A. Anthony Bloom\*, David Schimel, Colm Sweeney, Nicholas C. Parazoo, David Medvigy, Gabriela Schaepman-Strub, Chunmiao Zheng, Christopher R. Schwalm, Deborah N. Huntzinger, Anna M. Michalak, Charles E. Miller

\*Corresponding author. Email: [sujong@snu.ac.kr](mailto:sujong@snu.ac.kr) (S.-J.J.); [abloom@jpl.nasa.gov](mailto:abloom@jpl.nasa.gov) (A.A.B.)

Published 11 July 2018, *Sci. Adv.* **4**, eaao1167 (2018)

DOI: 10.1126/sciadv.aao1167

#### This PDF file includes:

Table S1. Prior parameter value ranges.

Table S2. MsTMIP models in this study (BG1 simulations).

Fig. S1. Comparison between simulated NEE and observed  $\Delta\text{CO}_2$ .

Fig. S2. Comparison of net primary productivity and heterotrophic respiration between optimized model and MsTMIP terrestrial biosphere models.

Fig. S3. Posterior probability distribution of the ratio of effective  $Q_{10}$  temperature sensitivity parameters  $p_2$  (NPP) and  $p_4$  (Rhet) [see Materials and Methods (Retrieved residence time change and temperature sensitivities) and table S1 for details].

Fig. S4. Relationships between  $\Delta\text{CO}_2$  and soil temperature (0 to 40 cm).

Fig. S5. Lagged (0 to 3 months) relationships between summertime vegetation greenness and autumn  $\Delta\text{CO}_2$ .

References (42, 43)

**Table S1. Prior parameter value ranges.**

| Parameter      | Description                                                                                                                                                           | Prior range                                             |
|----------------|-----------------------------------------------------------------------------------------------------------------------------------------------------------------------|---------------------------------------------------------|
| p <sub>1</sub> | Productivity constant: equivalent to NPP per unit leaf area (m <sup>2</sup> /m <sup>2</sup> ) per unit solar radiation (MJ/m <sup>2</sup> /day <sup>-1</sup> ) at 0°C | 0.01 – 100 gC m <sup>-2</sup> month <sup>-1</sup>       |
| p <sub>2</sub> | Temperature dependence constant: <i>NPP</i> factor increase per 10°C                                                                                                  | 1 – 10                                                  |
| p <sub>3</sub> | <i>C</i> turnover at 0°C.                                                                                                                                             | 10 <sup>-5</sup> – 10 <sup>-1</sup> month <sup>-1</sup> |
| p <sub>4</sub> | Temperature dependence constant: <i>R</i> factor increase per 10°C.                                                                                                   | 1 – 10                                                  |
| C <sub>0</sub> | Total active ecosystem carbon on January 1 <sup>st</sup> 1979.                                                                                                        | 10 <sup>2</sup> – 10 <sup>6</sup> gC m <sup>-2</sup>    |

**Table S2. MsTMIP models in this study (BG1 simulations).**

| Model name   | Affiliation                             |
|--------------|-----------------------------------------|
| Biome-BGC    | NASA Ames                               |
| CLASS-CTEM-N | McMaster University                     |
| CLM4         | Oak Ridge National Lab                  |
| CLM4VIC      | Pacific Northwest National Lab          |
| DLEM         | Auburn University                       |
| ISAM         | University of Illinois Urbana Champaign |
| TEM6         | Oak Ridge National Laboratory           |
| TRIPLEX-GHG  | University of Quebec at Montreal        |

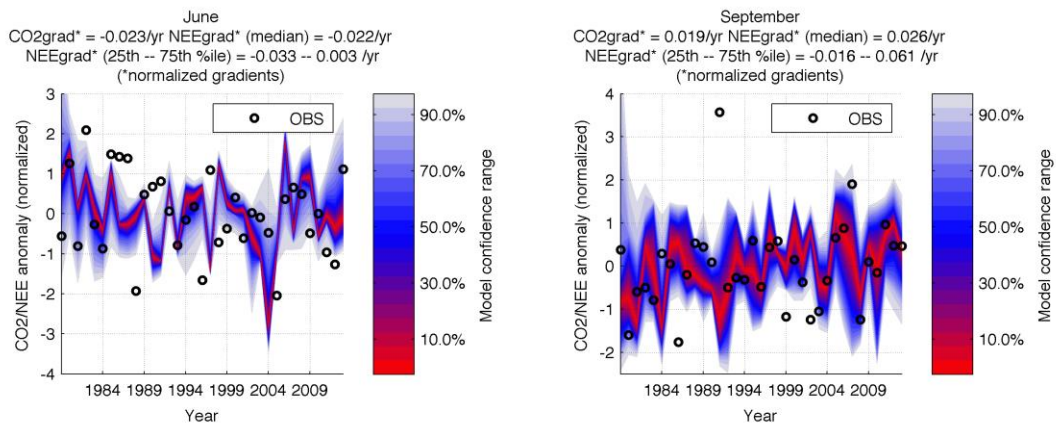

**Fig. S1. Comparison between simulated NEE and observed  $\Delta\text{CO}_2$ .** June (left) and September (right) observed  $\Delta\text{CO}_2$  (black circles) and modeled NEE (red/blue confidence range bands) normalized anomalies.

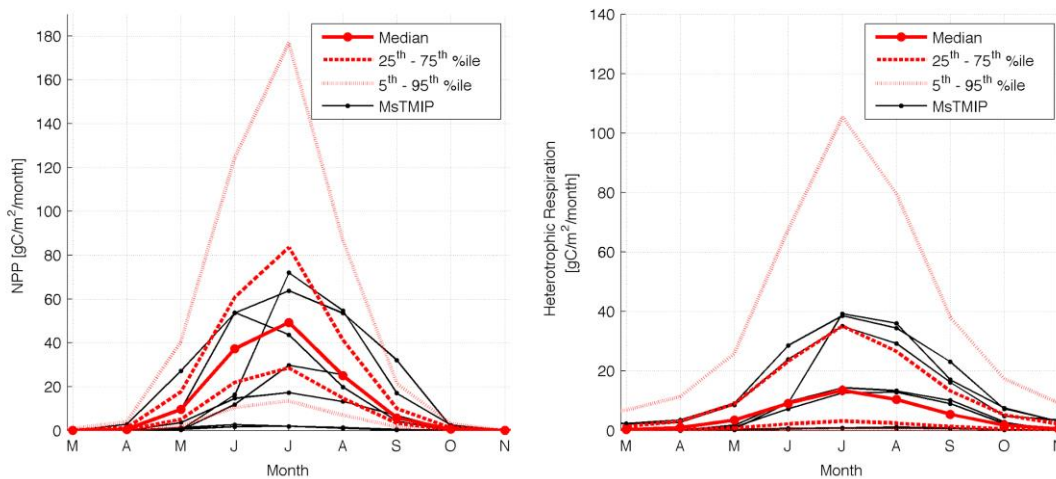

**Fig. S2. Comparison of net primary productivity and heterotrophic respiration between optimized model and MsTMIP terrestrial biosphere models.** Comparison of net primary productivity (NPP, left) and heterotrophic respiration (right) optimized model output (median, 5<sup>th</sup>, 25<sup>th</sup>, 75<sup>th</sup> and 95<sup>th</sup> percentiles) and MsTMIP terrestrial biosphere models (39).

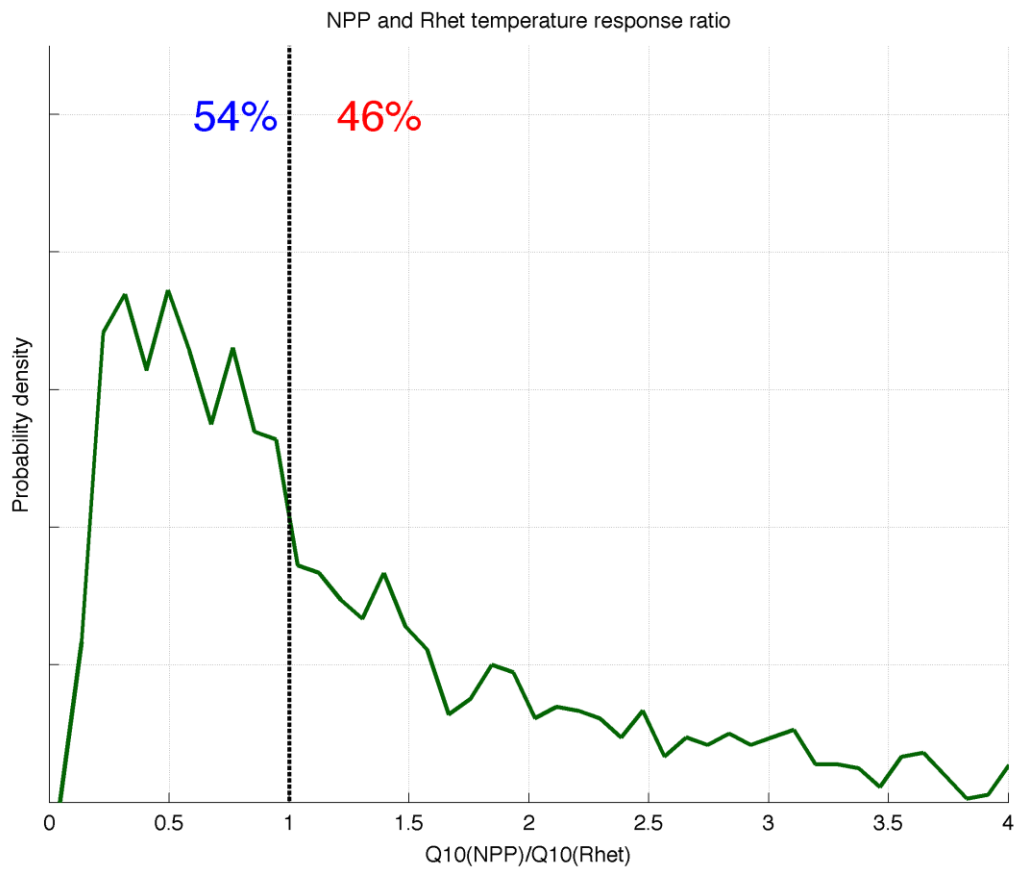

**Fig. S3. Posterior probability distribution of the ratio of effective  $Q_{10}$  temperature sensitivity parameters  $p_2$  (NPP) and  $p_4$  (Rhet) [see Materials and Methods (Retrieved residence time change and temperature sensitivities) and table S1 for details].** Based on the posterior parameter samples, we find that the probability of  $p_4 > p_2$  is 54%.

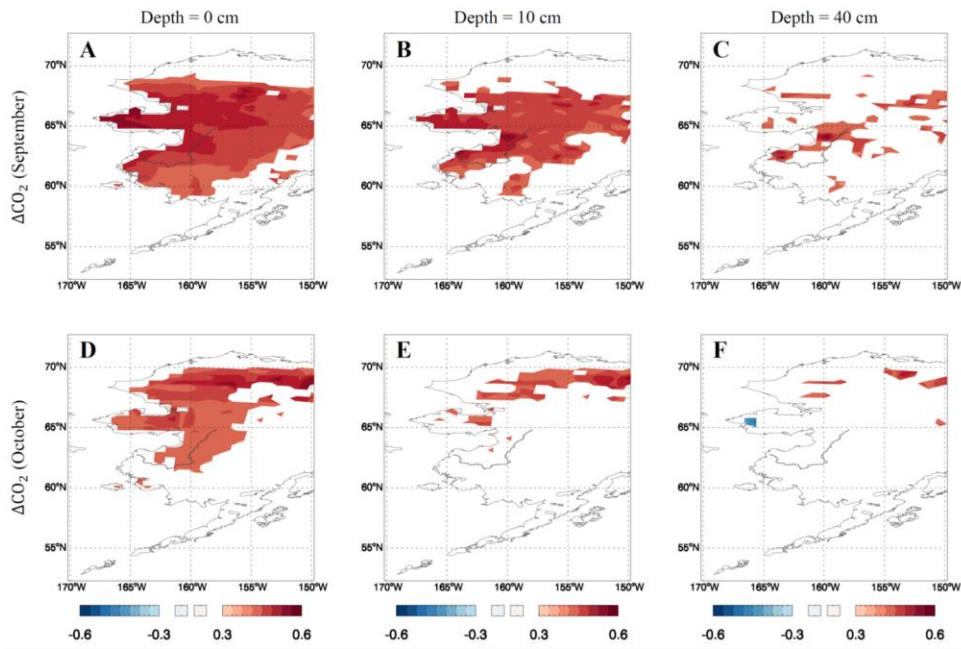

**Fig. S4. Relationships between  $\Delta\text{CO}_2$  and soil temperature (0 to 40 cm).**

Correlation coefficients between detrended  $\Delta\text{CO}_2$  and detrended soil temperature for September and October, respectively. Regions with statistically significant correlations are only described. Soil temperature data comes from North American Regional Reanalysis (NARR) (42).

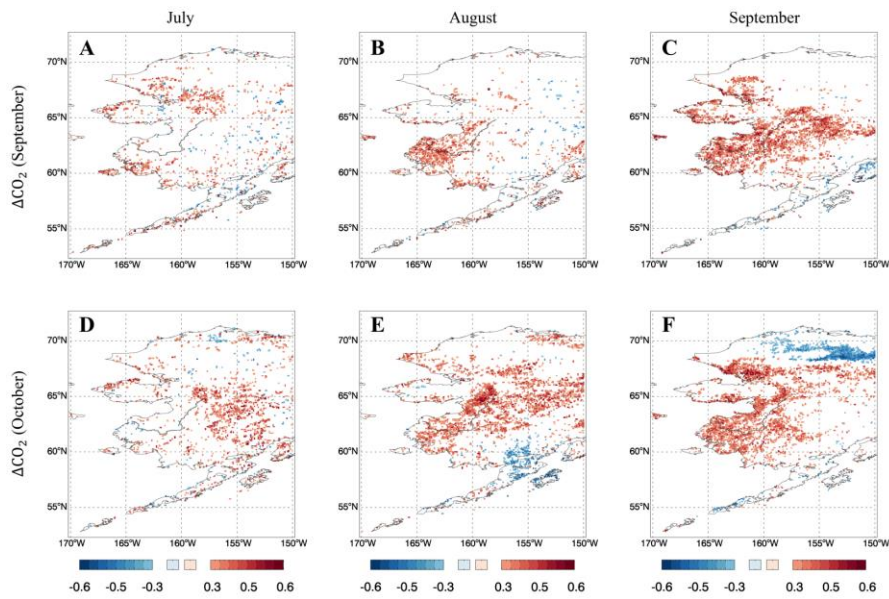

**Fig. S5. Lagged (0 to 3 months) relationships between summertime vegetation greenness and autumn  $\Delta\text{CO}_2$ .** Correlation coefficients between detrended NDVI (July to September) and detrended  $\Delta\text{CO}_2$  for September (A-C) and October (D-F), respectively. Regions with statistically significant correlations are only described. Positive coefficients indicate increase (or decrease) in summer/autumn vegetation greenness, leading to an increase (or decrease) in  $\Delta\text{CO}_2$  during autumn. High resolution (8 km) NDVI data sets come from the new Global Inventory Modeling and Mapping Studies (GIMMS) NDVI3g data from the Advanced Very High Resolution Radiometer (AVHRR) sensors (43) that has been widely used for evaluating climate and ecosystem changes.
